# Supplementary material for: Prospective Analysis of the Temporal Relationship between Psychological Distress and Atopic Dermatitis in Female Adults: A Preliminary Study
Source: MDPI journal article supplement (doi:10.3390/healthcare10101913), 2022-09-29
Supplement: s1 [file s1]

**Title: Prospective analysis of the temporal relationship between psychological distress and atopic dermatitis in female adults**

Gurkiran Birdi PhD, Michael Larkin PhD, Rebecca C Knibb PhD

School of Psychology, College of Health and Life Sciences, Aston University, Birmingham, B4 7ET, U.K.

## Supplementary Materials

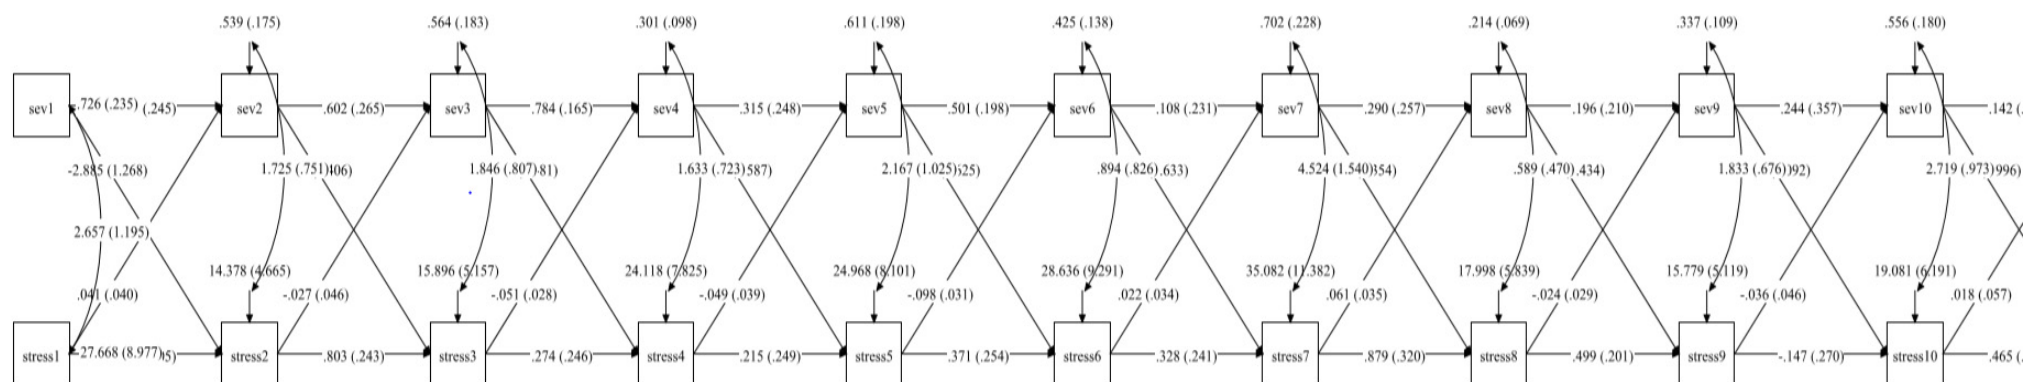

Figure S1: Cross lagged analysis snippet for psychological stress and disease severity for 10 days with  $\beta$  coefficients
